# Supplementary material for: mtDNA Single Nucleotide Variants Associated with Type 2 Diabetes
Source: Preprints.org preprint supplement (doi:10.20944/preprints202309.0086.v1), 2023-09-05
Supplement: Supplementary file 3 [file IJMS_2023 mtDNA_T2D_Table supplementary_1.docx]

| **Macrohaplogroup** | **ALL    N=2366** (100%) | **Controls    N=1105** (46.7%) | **T2D    N=1261** (53.3%) |
| --- | --- | --- | --- |
| **Haplogroups L** |  |  |  |
| L4 | 1 (0.08) | 0 (0.00) | 1 (0.08) |
| L3 | 2 (0.16) | 0 (0.00) | 2 (0.16) |
| **Haplogroups M** |  |  |  |
| M (includes Q) | 10 (0.86) | 6 (0.54) | 4 (0.32) |
| M7 | 48 (4.02) | 19 (1.72) | 29 (2.30) |
| M8 (includes C, Z) | 9 (0.71) | 0 (0.00) | 9 (0.71) |
| M9 (includes E) | 22 (1.80) | 5 (0.45) | 17 (1.35) |
| G | 10 (0.84) | 4 (0.36) | 6 (0.48) |
| D | 64 (5.32) | 22 (1.99) | 42 (3.33) |
| **Haplogroups N** |  |  |  |
| N1 (includes I) | 65 (5.52) | 33 (2.99) | 32 (2.54) |
| N2 (includes W) | 33 (2.82) | 18 (1.63) | 15 (1.19) |
| N9 (includes Y) | 16 (1.36) | 8 (0.72) | 8 (0.63) |
| A | 13 (1.06) | 3 (0.27) | 10 (0.79) |
| X | 31 (2.57) | 10 (0.90) | 21 (1.67) |
| **Haplogroups R** |  |  |  |
| R (includes P) | 7 (0.57) | 1 (0.09) | 6 (0.48) |
| R0 (includes HV, H, V) | 1070 (90.36) | 492 (44.52) | 578 (45.84) |
| JT (includes J, T) | 411 (34.96) | 211 (19.10) | 200 (15.86) |
| R9 (includes F) | 43 (3.62) | 19 (1.72) | 24 (1.90) |
| B | 49 (4.13) | 22 (1.99) | 27 (2.14) |
| U (includes K) | 462 (39.23) | 232 (21.00) | 230 (18.24) |

**Table S1.**  Frequency distribution of the different haplogroups in diabetic and control cases.
