# Supplementary material for: mtDNA Single Nucleotide Variants Associated with Type 2 Diabetes
Source: Preprints.org preprint supplement (doi:10.20944/preprints202309.0086.v1), 2023-09-05
Supplement: Supplementary file 4 [file IJMS_2023 mtDNA_T2D_Table supplementary_2.docx]

**Table S2.** List of pre graduate students who collaborated in different stages of the process and analysis carried out in this project as part of the activities during the Pacific Scientific and Technological Research Summer Program 2019-2022 <https://programadelfin.org.mx>, in the research lines *Automation for Detection of Heteroplasmy in Mitochondrial Sequences, Mitochondrial Genomics associated with Chronic Degenerative Diseases* and *Applications of Data Science in Health*.

**Benemérita Universidad Autónoma de** [**Puebla**](mailto:Puebla.amairani.gomezr@alumno.buap.mx)

Baneco Rodas Ixchel Xiadani

Bernabé Gaspar Luis Eduardo

Blanco Aguilar Maria Esther

Delgado Gaytán Alexandra Viridiana

del Valle García Tania

Diaz De Lucio Yrving Daniel

Escobedo Valdez Gloria

Gómez Rodríguez Amairani

Jaimez Alvarado Samuel

Ortiz Virgen Edwin Gerardo

Quebrado Benitez Ángel Sebastian

Reyes Ramírez Lucianny Guadalupe

Romero Balboa Osorio Adriana

Váquez Páez María Fernanda

Yarce Cabrera Luis Miguel

**Instituto Politécnico Nacional (Ciudad de México)**

Flores Reyes Ana Karen

González Sánchez Alhelí Rocío

Juarez HernandezMisael Alejandro

Vélez Solís Carlos Alberto

**Instituto Tecnológico de Los Mochis (Sinaloa)**

Lugo Martinez Perla Yareli

Ruelas Ortiz Daniela

Velázquez Mercado Mariesther del Rosario

**Universidad Autónoma de Baja California**

Sara María Zárate Soto

**Universidad Autónoma de Chiapas**

Ballardo Vega Nancy Yrasema

Méndez Hernández Dulce Paola

**Universidad Autónoma de Occidente (Sinaloa)**

Astorga Leal Fátima

Báez Cervantes Sanely

Castro Leal Lilia Judith

Luna Valdez María Angélica

Pacheco Álvarez Astrid

Santana Quintero Luis Fernando

Zamudio Ahumada Reyna Consuelo

**Universidad Autónoma de Tamaulipas**

Amaro Diaz Samantha Guadalupe

Hernández Luna Jesús Alberto

**Universidad Autónoma del Estado de México**

del Moral Bastida Jesús Armando

Vargas Contreras María José

Alvarez Nava Mario

Valdez Romero Juan Jesus

Rodriguez Piña Miriam Deyanira

**Universidad de Guadalajara**

Acosta Romero Ernesto

Alvarez Martínez José de Jesús

Ascencio Reyes Juan Manuel

Barrera LujánXimena Paola

Campos Murillo Alejandra

Domínguez Sandoval María Fátima

Garcia Navarro Cesar Oswaldo

Gaspar Zuno Jesús Salvador

Gómez Castellanos Víctor Eduardo

Guizar López Rafael

Gutiérrez Luévanos Josué

Guzmán Vázquez Juan José

Jiménez Zermeño Lizbeth Deyanira

Mariscal Quirarte Karla Alejandra

Martínez Merlo David

Medina España Nayeli Tatiana

Mendoza Prado Jessica Verónica

Meraza Abarca Carlos Daniel

Morales Hernández Andrea Anahí

Muñoz Navarro Krystal Sofía

Pedroza Mata María Guadalupe

Sánchez Gutiérrez María Fernanda

Sierra Picos María Fernanda

Vargas Oceguera Erick Alejandro

Velasco Pérez Nidia Guadalupe

Xicotencatl Soto Elizabeth Patricia

**Universidad Autónoma de Guerrero**

Jesus Alberto Meza Hernandez

**Universidad Autónoma de Sinaloa**

Ballardo Vega Nancy Yrasema

Lao García Angelina

Luque Camacho Carmen Alejandra

Moraila García Beatriz Guadalupe

Rábago Monzón Juan Eduardo

Romero Iturrios Jaciel Eduardo

Soto Gómez Dzidzielia Dejanira

Torres Melchor Erika Liliana

**Universidad de Monterrey**

Saavedra Hernández Annel

Eugenia Urbina Arias Natalia

**Universidad de Sonora**

Carranza Cruz Vania Sofia

**Universidad Popular Autónoma del Estado de Puebla**

Contreras Cerón Luis Manuel

**Universidad Veracruzana**

Velazquez MelchorMariana

**Universidad Vizcaya de las Américas (Mérida, Yucatán)**

Sierra TuzShelby Christel
